# Supplementary material for: Indian traditional rice variety “Gathuwan” suppresses T-cell-mediated immune responsesviaactivation of ERK/Nrf2/HO-1 signalling pathway
Source: Royal Society of Chemistry journal article supplement (doi:10.1039/d3fo00125c), 2023-01-01

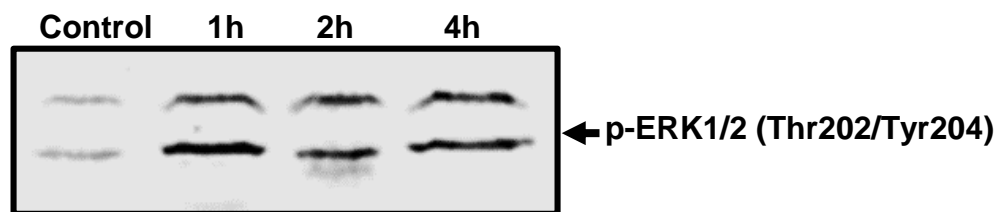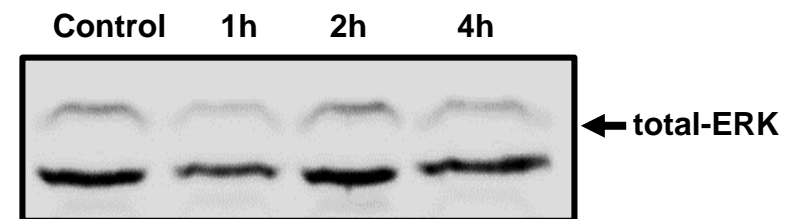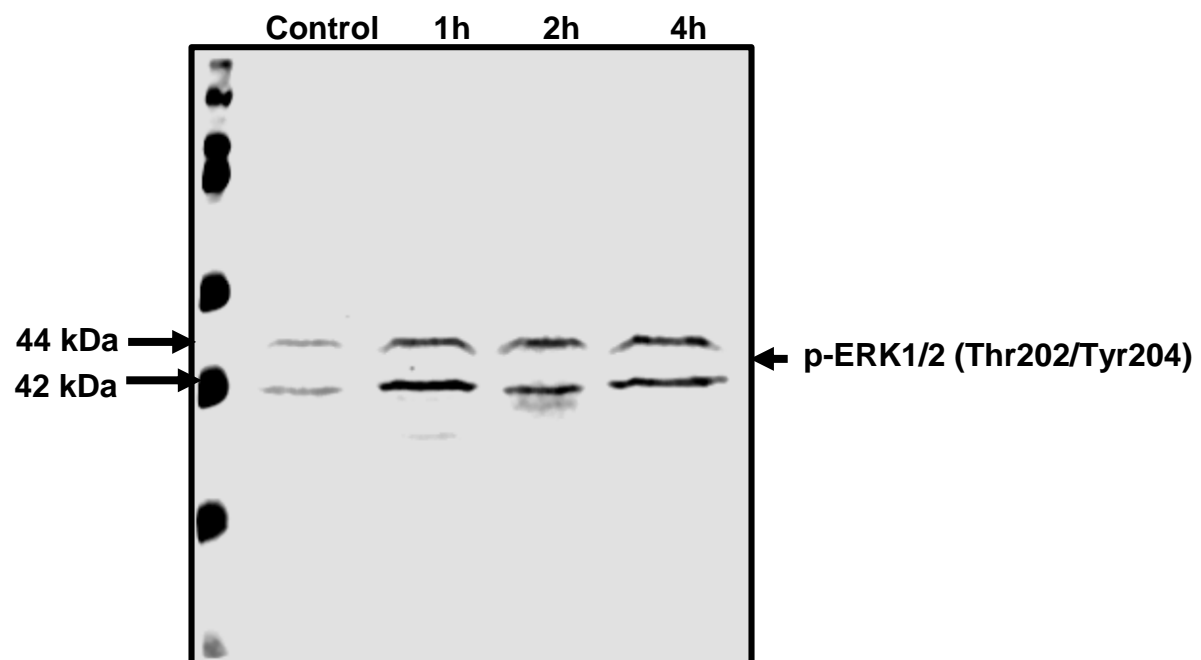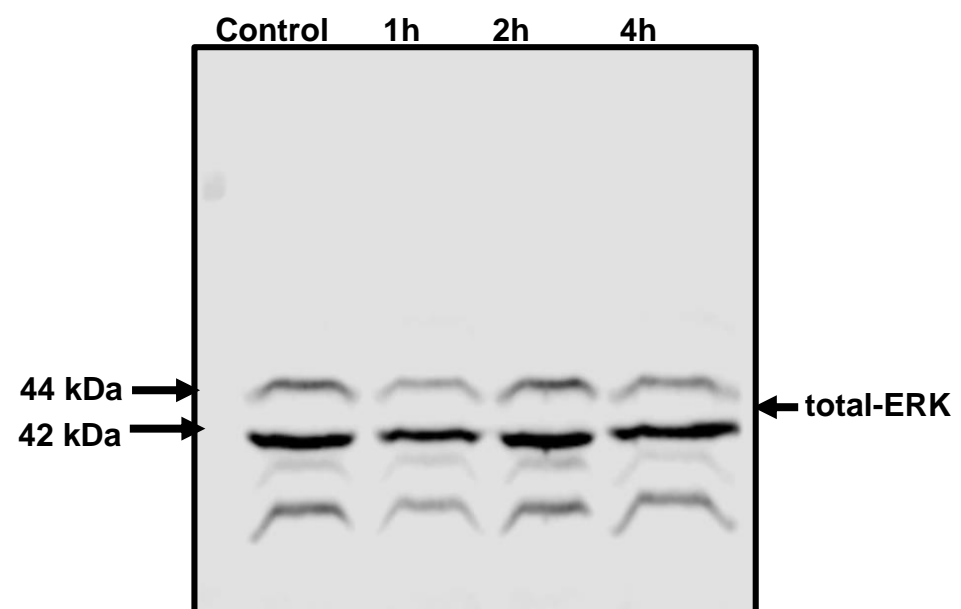

Uncropped blots: phospho-p38 and p-38

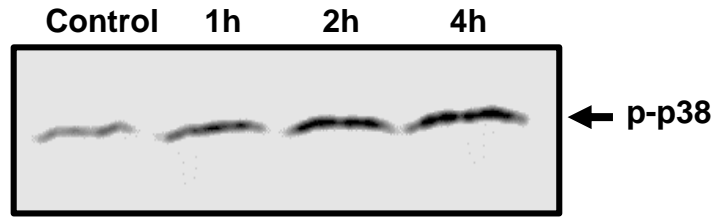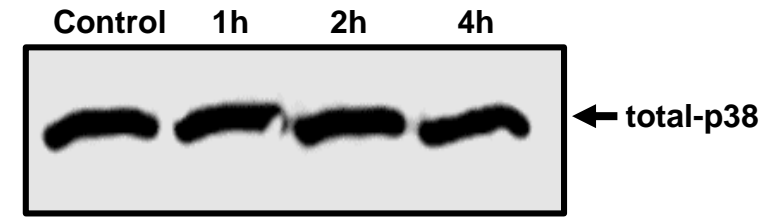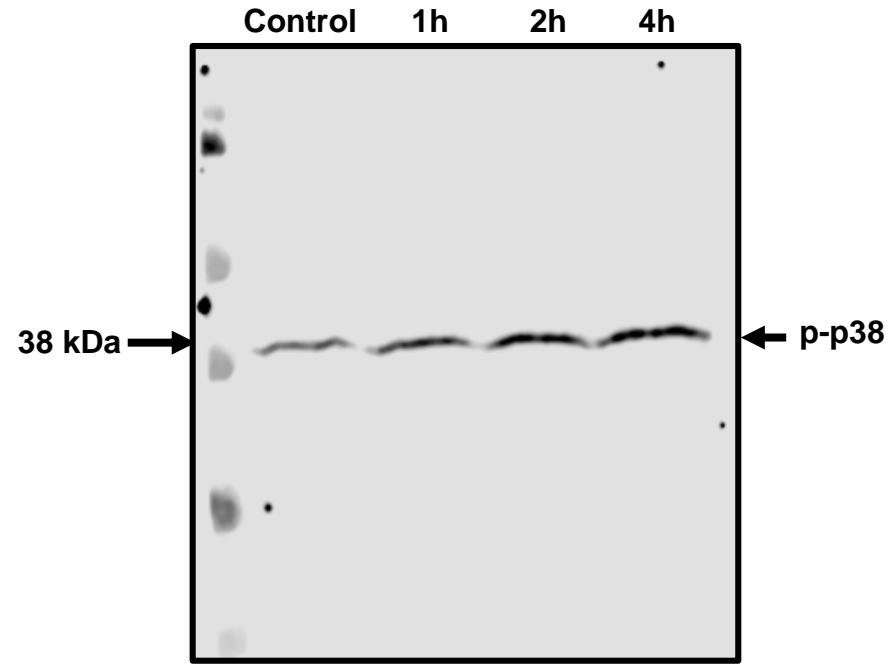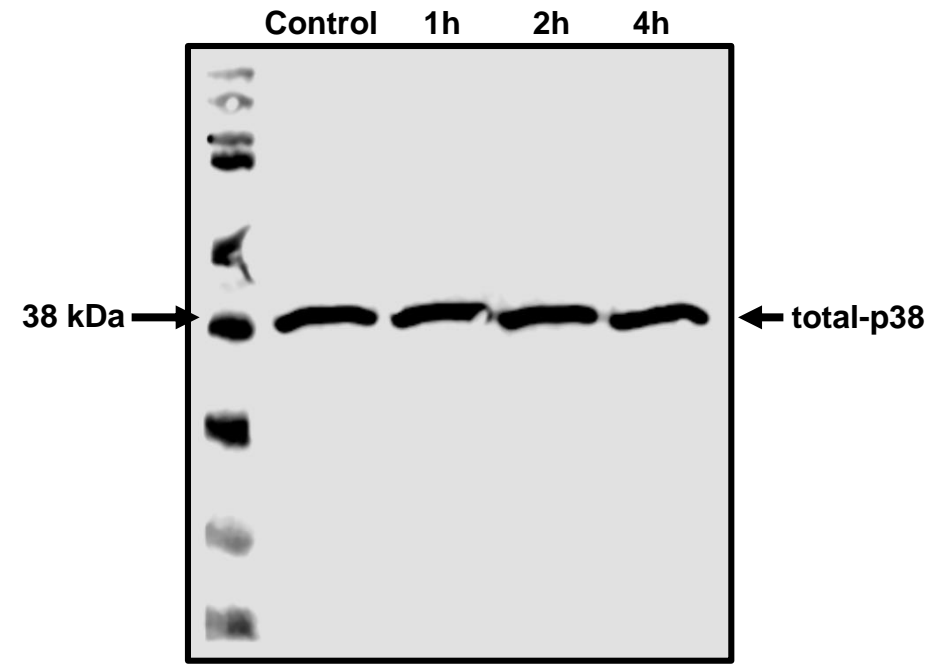

Uncropped blots: HO-1 and Actin

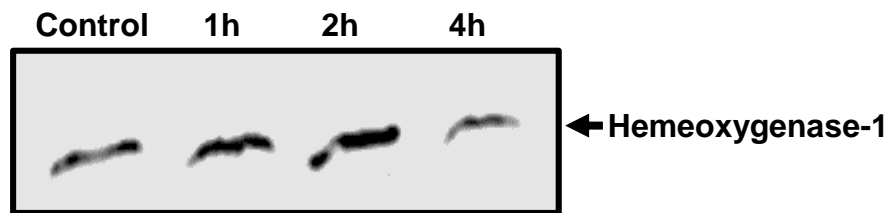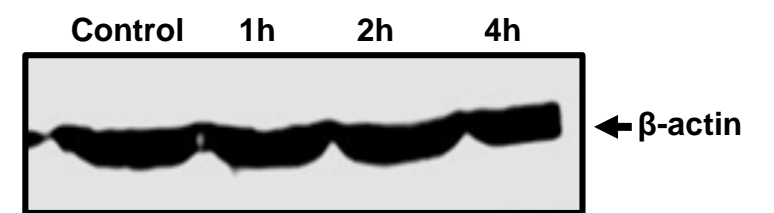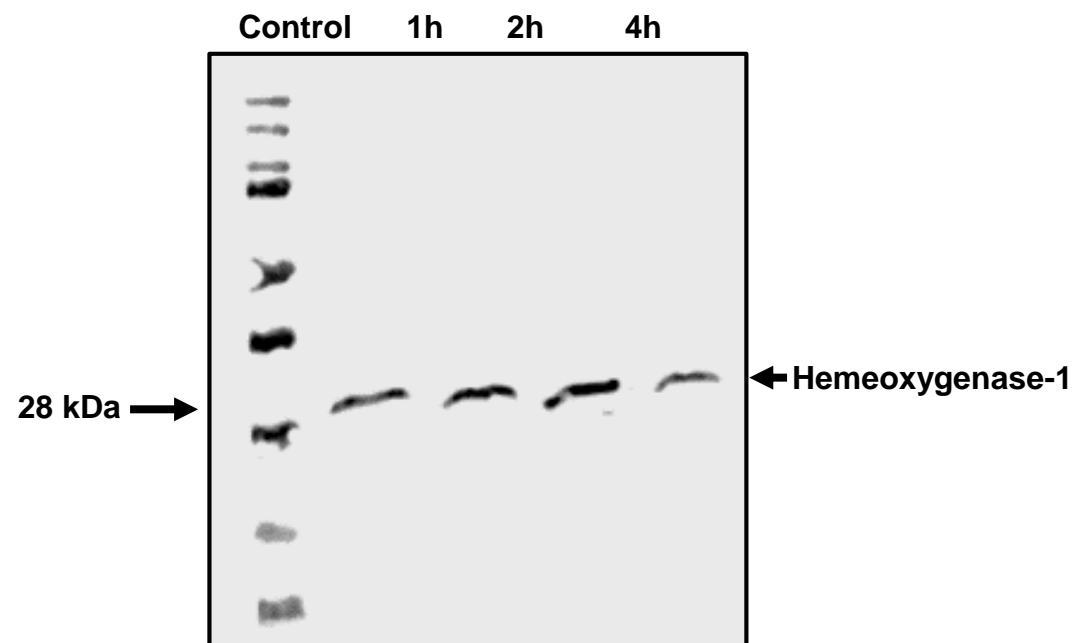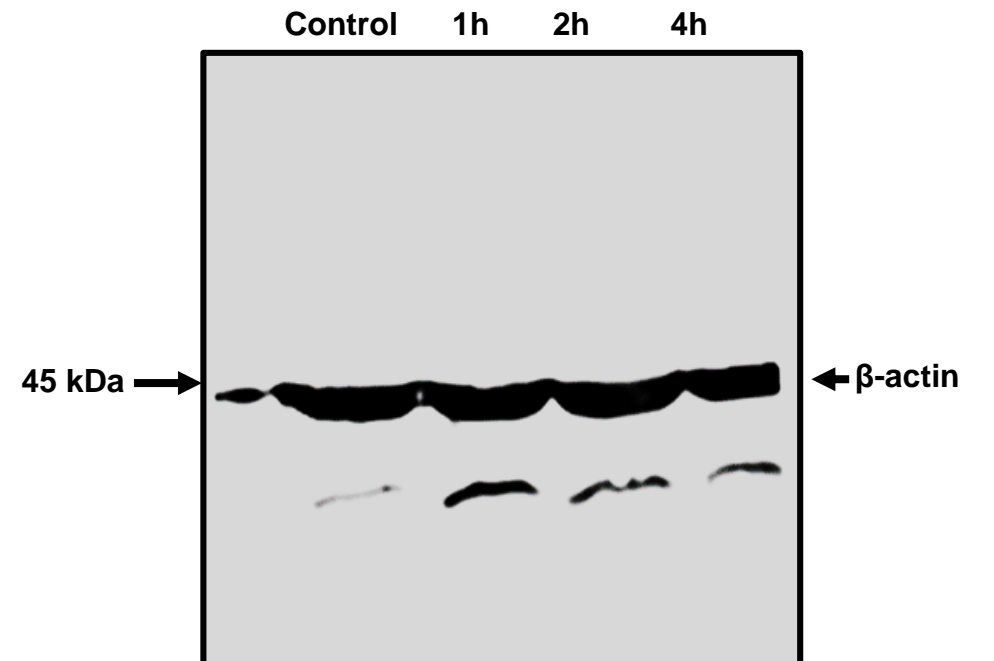

Uncropped blots: catalase and Actin

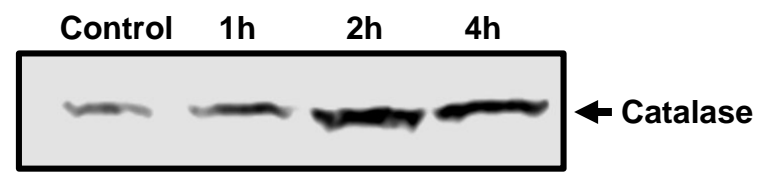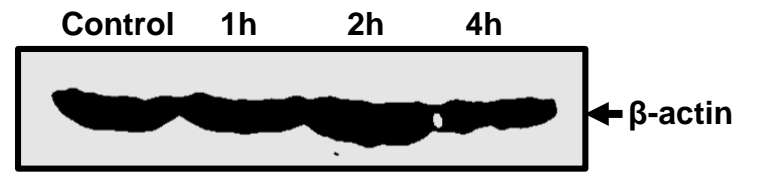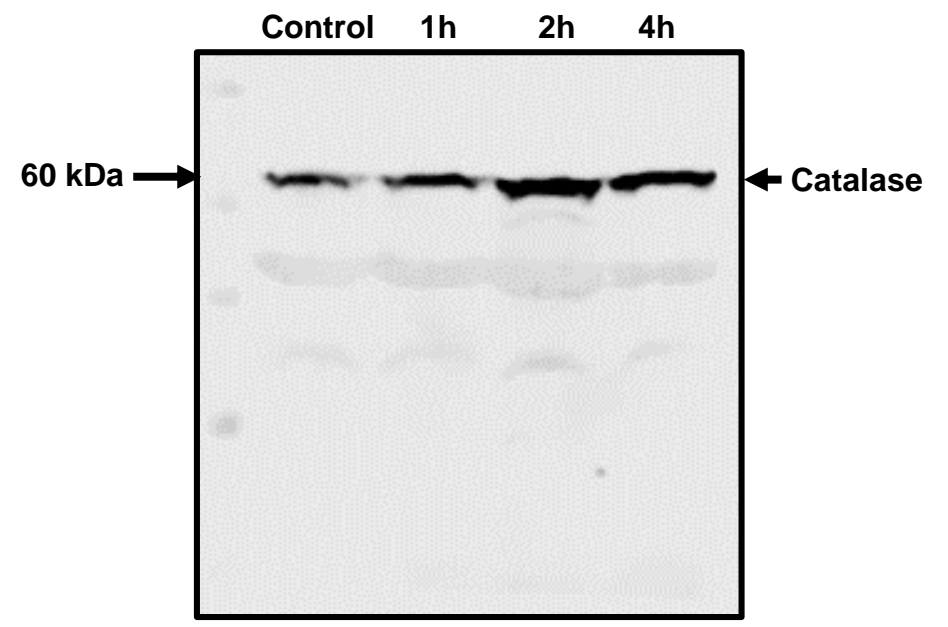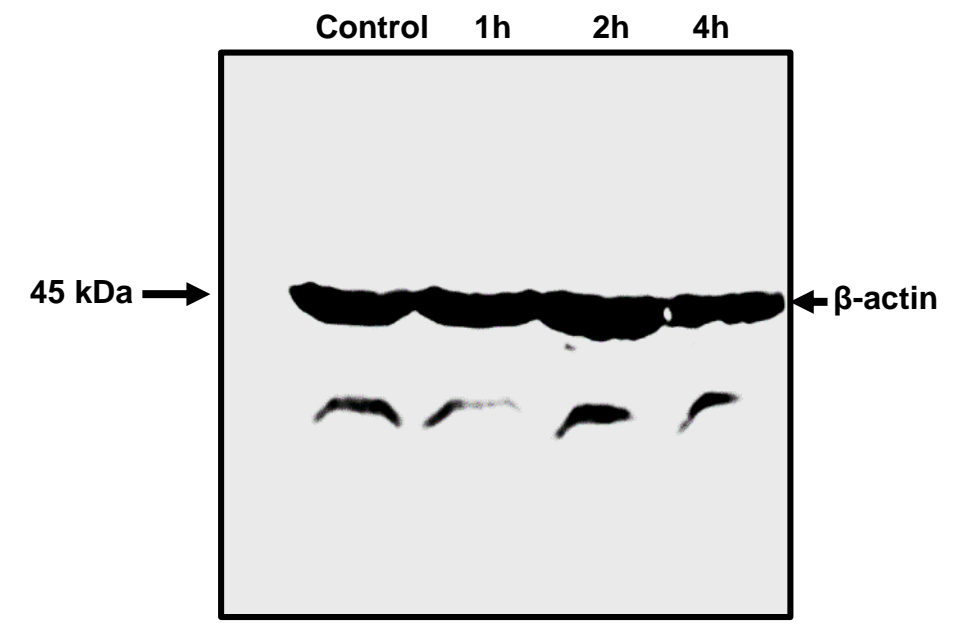

Uncropped blots: SOD and Actin

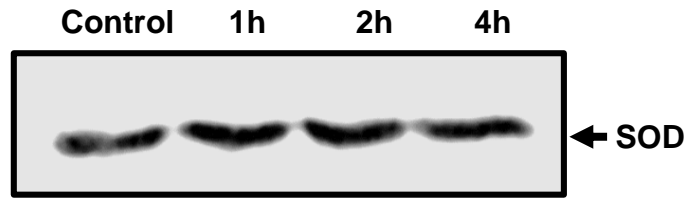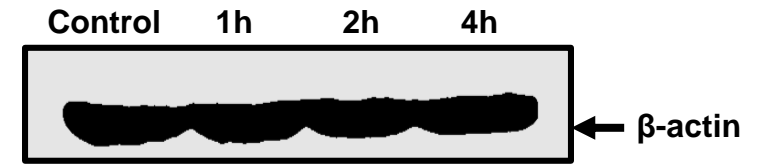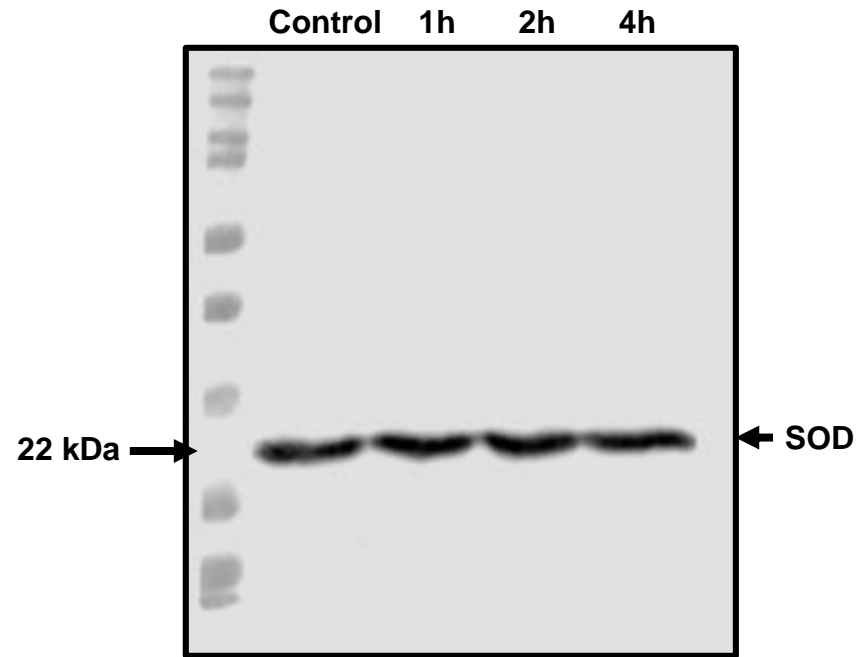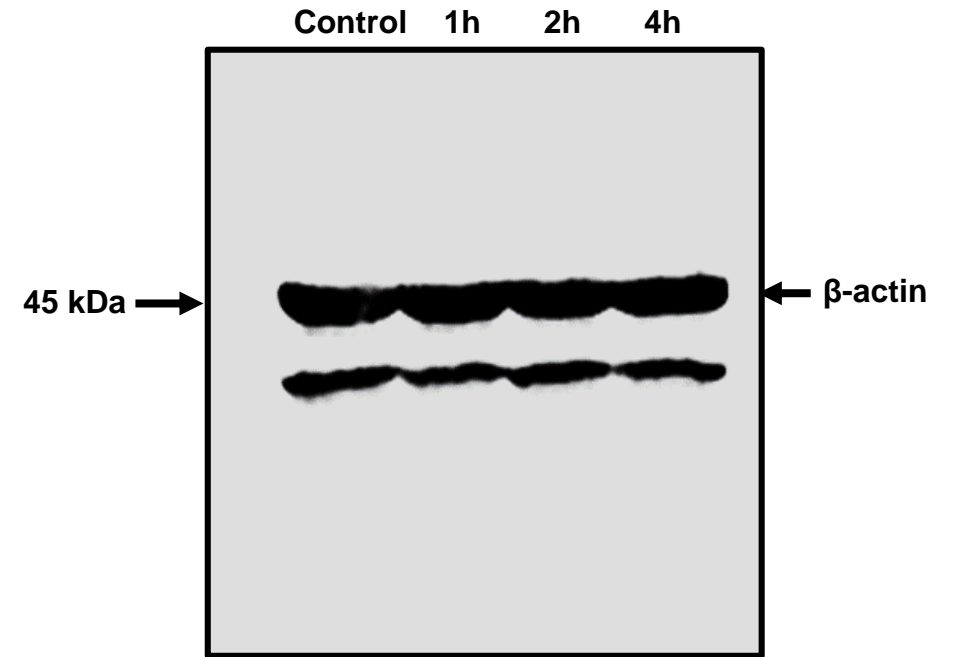

Supplement: d3fo00125c1.pdf [file d3fo00125c1.pdf]
