# Supplementary material for: Indian traditional rice variety “Gathuwan” suppresses T-cell-mediated immune responsesviaactivation of ERK/Nrf2/HO-1 signalling pathway
Source: Royal Society of Chemistry journal article supplement (doi:10.1039/d3fo00125c), 2023-01-01
Supplement: d3fo00125c2.pdf [file d3fo00125c2.pdf]

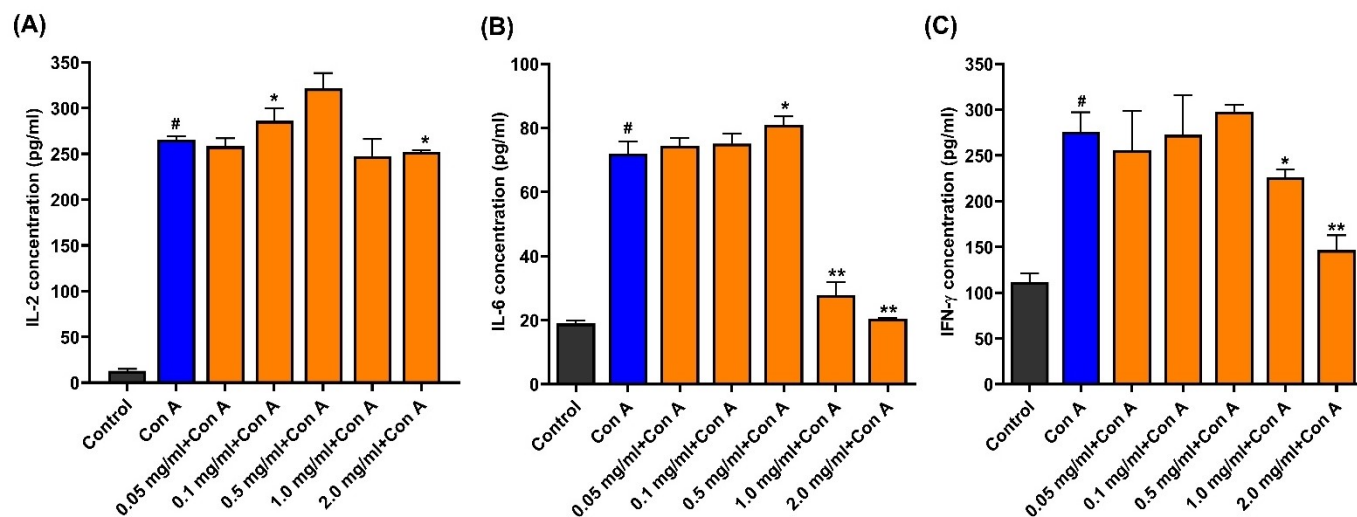

Figure S1. Effect of aqueous extract of Gathuwan Brown rice (aq. BRE) on mitogen induced cytokine secretion: Lymphocytes were treated with aq. BRE for 4h and then stimulated with Con A for 24 h. Supernatant was harvested and concentration of IL-2, IL-6 and IFN- $\gamma$  cytokines was measured (A-C). Data represent mean  $\pm$  SEM values from three replicates and three such independent experiments were carried out. # p<0.01 as compared to control, \* and \*\* represents p<0.05 and p<0.01 respectively as compared to Con A.
