# Supplementary material for: Indian traditional rice variety “Gathuwan” suppresses T-cell-mediated immune responsesviaactivation of ERK/Nrf2/HO-1 signalling pathway
Source: Royal Society of Chemistry journal article supplement (doi:10.1039/d3fo00125c), 2023-01-01
Supplement: d3fo00125c3.pdf [file d3fo00125c3.pdf]

Table S1 : List of bioactive compounds identified in LC-MS/MS data along with their implicated bioactivities. Literature search was undertaken to highlight compounds having immunomodulatory, redox modulatory activities or impacting immune signalling pathways.

| S.No | Match                                           | Compound class           | Biological effect(s)                                                                                                               | Activities/Mechanisms                                                                                      | Reference |
|------|-------------------------------------------------|--------------------------|------------------------------------------------------------------------------------------------------------------------------------|------------------------------------------------------------------------------------------------------------|-----------|
| 1    | <b>1,2,3-Trihydroxybenzene (Pyrogallol)</b>     | Benzenoids (Phenolics)   | Enhancement of therapeutic effect of human umbilical cord mesenchymal stem cells against LPS-mediated inflammation and lung injury | Activates Nrf2/HO-1 signalling                                                                             | 1         |
|      |                                                 |                          | Anti-inflammatory effect in bronchial epithelial cells                                                                             | Regulates expression of pro-inflammatory genes                                                             | 2         |
| 2    | <b>10-Nitrolinoleic Acid</b>                    | Nitrated Fatty acids     | Inhibition of proliferation of vascular smooth muscle cells                                                                        | Activation of Keap1-Nrf2 pathway                                                                           | 3         |
|      |                                                 |                          | Anti-inflammatory effect                                                                                                           | Inhibition of 5-lipoxygenase                                                                               | 4         |
| 3    | <b>4-Hydroxybenzaldehyde</b>                    | Benzenoids (Phenolics)   | Protective effect on blood-brain barrier                                                                                           | Enhances antioxidant capacity by activating the Nrf2/ARE pathway                                           | 5         |
|      |                                                 |                          | Antiepileptic and anticonvulsive activity                                                                                          | Anti-oxidative effect and GABAergic neuromodulation of the rat brain                                       | 6         |
| 4    | <b>4-Hydroxycinnamic Acid (p-coumaric acid)</b> | Cinnamic acid (Phenolic) | Anti-Inflammatory effects in rat arthritis model                                                                                   | Decreases arthritis index, infiltration of inflammatory cells and levels of pro-inflammatory cytokines     | 7         |
|      |                                                 |                          | Attenuates alcohol exposed hepatic injury in experimental models                                                                   | Inhibits MAPKs and apoptosis signalling by enhancing Nrf2 signalling                                       | 8         |
| 5    | <b>4-Hydroxymethylcatechol</b>                  | Catechol (Phenolic)      | Attenuation of rheumatoid arthritis                                                                                                | Inhibits PI3K/Akt/NF-κB signalling                                                                         | 9         |
| 6    | <b>4-Hydroxyproline</b>                         | Amino acid               | Attenuates DSS-induced colitis in mice                                                                                             | Inhibits NF-κB/IL-6 signalling and restores redox homeostasis.                                             | 10        |
| 7    | <b>Adenosine</b>                                | Nucleoside               | Modulation of microglial ROS production to regulate brain inflammation                                                             | Induces HO-1 expression through the activation of PI3K and Nrf2                                            | 11        |
| 8    | <b>Alpha-Linolenic Acid</b>                     | Fatty acid               | Anti-inflammatory effect in RAW 264.7                                                                                              | Downregulates inflammatory iNOS, COX-2, and TNF- by blocking activation of NF-κB and MAPKs                 | 12        |
|      |                                                 |                          | Impediment of Cadmium-induced oxidative stress, neuroinflammation, and neurodegeneration in mouse brain                            | Reduces ROS production and NOS2 and enhanced the expression Nrf-2 and HO-1                                 | 13        |
| 9    |                                                 | Fatty acid               | Modulation of inflammatory response in normal human keratinocytes                                                                  | Reduced nuclear translocation of NF-κB p65 subunit and phosphorylation of the p38 MAPK and activated PPARγ | 14        |

|    |                                      |                        |                                                                                                 |                                                                                                    |    |
|----|--------------------------------------|------------------------|-------------------------------------------------------------------------------------------------|----------------------------------------------------------------------------------------------------|----|
| 10 | <b>Dodecanoic Acid (Lauric acid)</b> | Fatty acid             | Anti-inflammatory properties against <i>Propionibacterium</i> acnes                             | Inhibits NF- $\kappa$ B activation and phosphorylation of MAP kinases                              | 15 |
|    |                                      |                        | Amelioration of LPS-induced liver inflammation in Sprague Dawley rats                           | Downregulates the expression of TLR4/NF- $\kappa$ B mediating proteins                             | 16 |
| 11 | <b>Erythritol</b>                    | Sugar alcohol (Polyol) | Improvement in non-alcoholic fatty liver disease condition                                      | Enhances Nrf2/HO-1/NQO1 antioxidant Capacity                                                       | 17 |
| 12 |                                      | Dipeptide              | Anti-inflammatory effects in sepsis models                                                      | Increases glutathione levels                                                                       | 18 |
|    |                                      |                        | Alleviation of ethanol-induced hepatotoxicity                                                   | Suppresses oxidative stress, apoptosis, and inflammation                                           | 19 |
| 13 | <b>Indoleacetic Acid</b>             | Indole derivative      | Anti-inflammatory and anti-oxidative activity in RAW264.7 cells                                 | Downregulates NF- $\kappa$ B and upregulating HO-1                                                 | 20 |
|    |                                      |                        | Protective effect on H <sub>2</sub> O <sub>2</sub> -damaged human dental pulp stem cells        | Increases the expression of Nrf2 and HO-1 through Akt pathway                                      | 21 |
| 14 | <b>Isoquinoline</b>                  | Alkaloid               | Activation of Nrf2-dependent transcription and hepatocellular protection                        | Disrupts Keap1-Nrf2 protein complex                                                                | 22 |
|    |                                      |                        | Anti-inflammatory activity against established adjuvant arthritis in rats                       | Reduces chronic inflammation                                                                       | 23 |
| 15 | <b>L-Acetylcarnitine</b>             | Fatty acyls            | Neuroprotection during hypoxia in Sprague-Dawley rats                                           | ERK1/2-Nrf2-regulated mitochondrial biosynthesis                                                   | 24 |
|    |                                      |                        | Protection against oxidative stress in rat astrocytes                                           | Induction of HO-1 mediated by upregulation of Nrf2                                                 | 25 |
| 16 | <b>L-Arginine</b>                    | Amino acid             | Stimulation of GSH synthesis and up-regulation of ARE-driven antioxidant expressions            | Activation of Nrf2 pathway                                                                         | 26 |
|    |                                      |                        | Amelioration of cardiac left ventricular oxidative stress in alloxan-induced hyperglycemic rats | Upregulation of eNOS, Akt and Nrf2, downregulation of Nf- $\kappa$ B                               | 27 |
|    |                                      |                        | Inhibition of LPS-induced inflammatory response and oxidative stress in IPEC-J2 cells           | Reduction in the abundance of TLR4, MyD88, NF- $\kappa$ Bp65 and increase in the activity of Arg-1 | 28 |
| 17 | <b>L-Isoleucine</b>                  | Amino acid             | Improvement of intestinal immune function, antioxidant capacity and microbial population        | Upregulation of Nrf2 and p38 MAPK and downregulation of Keap1 and ERK1                             | 29 |
| 18 | <b>L-Lysine</b>                      | Amino acid             | Neuroprotection after mouse intracerebral hemorrhage injury                                     | Suppresses pro-inflammatory response                                                               | 30 |

|    |                                                |                |                                                                                                      |                                                                                                      |    |
|----|------------------------------------------------|----------------|------------------------------------------------------------------------------------------------------|------------------------------------------------------------------------------------------------------|----|
| 19 | <b>L-Serine</b>                                | Amino acid     | Antioxidant and cytoprotective effects in human endothelial cells                                    | Induction of Nrf2 activity and HO-1 expression                                                       | 31 |
|    |                                                |                | Reduces oxidative stress and inflammation during aging in mice                                       | Modulating the Sirt1/NFkB pathway                                                                    | 32 |
| 20 | <b>L-Tryptophan</b>                            | Amino acid     | Reduction in inflammation and enhancement of rate of recovery in DSS-induced colitis                 | Reduction of pro-inflammatory cytokines and ICAM-1                                                   | 33 |
|    |                                                |                | Anti-inflammatory in Intestinal Epithelial Cells                                                     | Inhibition of JNK or IκBα phosphorylation                                                            | 34 |
|    |                                                |                | Protection of hepatocytes against reactive oxygen species-dependent cell death via multiple pathways | Nrf2-dependent gene induction                                                                        | 35 |
|    |                                                |                | Modulation of intestinal immune response, barrier function, antioxidant status                       | Up-regulation of Nrf2 and downregulation of Keap1 gene expression                                    | 36 |
| 21 | <b>L-Valine</b>                                | Amino acid     | Anti-inflammatory activity in lipopolysaccharide (LPS) stimulated RAW 264.7 macrophages              | Suppression of iNOS, COX-2, IL-6 expression                                                          | 37 |
| 22 | <b>1-Palmitoyl-sn-glycero-3-phosphocholine</b> | Phospholipid   | Anti-inflammatory activity in LPS-stimulated human monocyte THP-1 cells                              | Reduces pro-inflammatory markers                                                                     | 38 |
| 23 | <b>Monoolein</b>                               | Lipid          | Inhibits lipopolysaccharide-induced inflammatory response                                            | Attenuates the activation of MAPK and NF-κB pathways                                                 | 39 |
| 24 | <b>Nicotinic Acid</b>                          | Vitamin        | Protection of liver against acetaminophen-induced hepatotoxicity in mice                             | Upregulation of Sirt1/Nrf2 antioxidative pathway                                                     | 40 |
|    |                                                |                | Anti-inflammatory effects of nicotinic acid in human monocytes                                       | Suppression of NF-κB signalling                                                                      | 41 |
| 25 | <b>Palmitoylethanolamide</b>                   | Lipid          | Regulation of NF-κB/Nrf2 pathways in benign prostatic hyperplasia                                    | Inhibition of NF-κB and upregulation of Nrf-2                                                        | 42 |
|    |                                                |                | Reduces inflammation and tissue injury associated with spinal cord injury                            | Reduction in NF-κB activation, and activation of peroxisome proliferator-activated receptor (PPAR)-α | 43 |
| 26 | <b>Phytosphingosine</b>                        | Sphingoid base | Inhibits TPA-Induced inflammatory epidermal hyperplasia in hairless mouse skin                       | Reduces edema, infiltration of inflammatory cells and generation of prostaglandin E2                 | 44 |
| 27 | <b>Pyridoxamine</b>                            | Vitamin        | Protective function of pyridoxamine on retinal photoreceptor cells in diabetic mice                  | Activation of the p-Erk1/2/Nrf2/Trx/ASK1 signalling pathway                                          | 45 |
| 28 | <b>Ricinoleic Acid</b>                         | Fatty acid     | Acute and subchronic experimental models of inflammation                                             | Reduces the edema induced by carrageenan and by complete Freund's adjuvant injection                 | 46 |

|    |                                              |                          |                                                                                                                            |                                                                                                                |    |
|----|----------------------------------------------|--------------------------|----------------------------------------------------------------------------------------------------------------------------|----------------------------------------------------------------------------------------------------------------|----|
| 29 | <b>Sinapic Acid</b>                          | Cinnamic acid (Phenolic) | Amelioration of cardiac dysfunction and cardiomyopathy in streptozocin induced diabetic rats                               | Decreases NF- $\kappa$ B p65 DNA binding and enhanced Nrf2-ARE DNA-binding activity                            | 47 |
|    |                                              |                          | Amelioration of D-galactosamine/lipopolysaccharide-induced fulminant hepatitis in rats                                     | Increases the activity of Nrf2/HO-1 signaling pathway                                                          | 48 |
| 30 | <b>trans-Ferulic Acid</b>                    | Cinnamic acid (Phenolic) | Cytoprotection against high glucose-induced oxidative stress in cardiomyocytes and hepatocytes                             | Keap1-Nrf2-ARE signaling pathway modulation                                                                    | 49 |
|    |                                              |                          | Prevention of oxidative stress, inflammation, and liver injury in methotrexate-induced rats                                | Upregulation of Nrf2/HO-1 signaling                                                                            | 50 |
| 31 | <b>Trigonelline</b>                          | Alkaloid                 | Mitigation of lipopolysaccharide-induced learning and memory impairment in rat                                             | Suppression of hippocampal oxidative stress and inflammation by lowering NF- $\kappa$ B/TLR4 and AChE activity | 51 |
|    |                                              |                          | Improvement in the responsiveness of NSCLC cells to Cisplatin and Etoposide                                                | Blocking activation and nuclear translocation of Nrf2 via inhibition of EGFR signalling pathway                | 52 |
| 32 | <b>Vanillin</b>                              | Benzenoids (Phenolics)   | Protection against cisplatin-induced nephrotoxicity in rats                                                                | Inhibition of NOX-4 and stimulation of Nrf2/HO-1 signalling pathway                                            | 53 |
|    |                                              |                          | Gastroprotective effect against ulcer formation                                                                            | Inflammatory response modulation involving downregulation of NF- $\kappa$ B                                    | 53 |
| 33 | <b>D-Pantothenic acid</b>                    | Vitamin                  | Protection against kainic acid-induced status epilepticus and associated neurodegeneration in mice                         | Anti-inflammatory                                                                                              | 54 |
|    |                                              |                          | Inhibition of RANKL induced osteoclastogenesis and ovariectomy induced osteoporosis                                        | Upregulation of FoxO1, FoxO2 and Nrf2                                                                          | 55 |
| 34 | <b>2,3,4,5-Tetrahydroxypentanal (Pectin)</b> | Heteropolysaccharide     | Alleviation of high fat diet-induced nonalcoholic fatty liver disease in mice                                              | -                                                                                                              | 56 |
|    |                                              |                          | Anti-inflammatory action in diabetic rats                                                                                  | Decreased volume of edema, release of myeloperoxidase, neutrophil infiltration and levels of TNF- and iNOS     | 57 |
| 35 | <b>Eleostearic acid (Punicic acid)</b>       | Conjugated fatty acid    | Amelioration of experimental inflammatory bowel disease in mice                                                            | PPAR $\gamma$ -dependent and -independent mechanisms                                                           | 58 |
|    |                                              |                          | Inhibition of TNF $\alpha$ -induced neutrophil hyperactivation and protection from experimental colon inflammation in rats | Targeting p38MAPKinase/Ser345-p47phox-axis and MPO release                                                     | 59 |

|    |                                                                          |                       |                                                                                                                         |                                                                                       |    |
|----|--------------------------------------------------------------------------|-----------------------|-------------------------------------------------------------------------------------------------------------------------|---------------------------------------------------------------------------------------|----|
| 36 | <b>12-Oxo phytodienoic acid</b>                                          | Lipid                 | Attenuation of inflammation and modulation of macrophage polarization                                                   | Inhibition of mPGES-1, NF- $\kappa$ B pathway and activation of Nrf2/HO-1 pathway.    | 60 |
|    |                                                                          |                       | Attenuation of lipopolysaccharide-induced inflammation in microglia                                                     | Inhibiting NF- $\kappa$ B and p38 MAPK and inducing SOCS-1                            | 61 |
| 37 | <b>N-(p-Coumaroyl) serotonin</b>                                         | Polyphenolics         | Suppression of proinflammatory cytokine production from monocytes                                                       | Inhibiting NF- $\kappa$ B activation                                                  | 62 |
|    |                                                                          |                       | Improvement of vascular distensibility and inhibition of aortic hyperplasia                                             | Inhibition of phosphorylation of PDGF receptor $\beta$ and ERK1/2, and Ca(2+) release | 63 |
| 38 | <b>(6E,8Z,11Z,14Z)-5-Oxo-6,8,11,14-icosatetraenoic acid (5-oxo-EETE)</b> | Fatty acids           | Nrf2 Activation in Human Umbilical Vascular Endothelial Cells                                                           | Increasing nuclear translocation of Nrf2                                              | 64 |
| 39 | <b>L-Glutathione</b>                                                     | Tripeptides           | Attenuation of IL-13-induced asthma in mice                                                                             | Buffering inflammation-associated reactive oxygen species                             | 65 |
| 40 | <b>Hymecromone (4-methylumbelliferone)</b>                               | Coumarins (Phenolics) | Suppression of Fc $\epsilon$ RI-mediated mast cell activation and allergic inflammation                                 | Inhibited phosphorylation of SYK, NF- $\kappa$ B p65, ERK1/2, p38, and JNK            | 66 |
| 41 | <b>Tricin 5-O-<math>\beta</math>-D-glucoside</b>                         | Flavones (Phenolics)  | Anti-inflammatory effects in LPS induced hPBMCs and carrageenan induced rats                                            | Blocking TLR4/NF- $\kappa$ B/STAT signalling cascade                                  | 67 |
|    |                                                                          |                       | Attenuation of cerebral ischemia/reperfusion injury through inhibiting nerve cell autophagy, apoptosis and inflammation | Activating the PI3K/Akt signalling pathway                                            | 68 |

## Abbreviations

AChE: Acetylcholinesterase  
 Akt: Protein kinase B (PKB)  
 ARE : Antioxidant responsive element  
 Arg-1: Arginase-1  
 ASK 1: Apoptosis signal-regulating kinase 1  
 COX2: Cyclooxygenase-2  
 DSS: Dextran sodium sulphate  
 EGFR: Epidermal growth factor receptor  
 eNOS: Endothelial Nitric oxide synthase  
 ERK1/2: Extracellular signal-regulated kinases 1/2  
 FoxO1: forkhead box O2  
 HO-1: Hemeoxygenase-1  
 hPBMCs: Human peripheral blood mononuclear cells  
 ICAM1: Intercellular Adhesion Molecule 1  
 iNOS: inducible Nitric oxide synthase  
 IL: Interleukin  
 JNK: c-Jun N-Terminal Kinase  
 Keap1: Kelch-like ECH-associated protein 1  
 LPS: Lipopolysaccharides  
 MAPKs : Mitogen activated protein kinases  
 mPGES-1: Microsomal prostaglandin E synthase-1  
 MPO: Myeloperoxidase  
 MyD88: Myeloid differentiation primary response 88

NF- $\kappa$ B: Nuclear factor kappa light chain enhancer of activated B cells  
 NOS2- Nitric oxide synthase 2  
 NOX: NADPH oxidase  
 NQO1: NAD(P)H quinone dehydrogenase 1  
 Nrf-2: Nuclear factor erythroid 2-related factor 2  
 NSCLC: Non-small cell lung cancer  
 PDGF: Platelet-derived growth factor  
 PI3K: Phosphoinositide 3-kinase  
 PPAR: peroxisome proliferator-activated receptor  
 RANKL: Receptor activator of nuclear factor kappa-B ligand  
 SIRT 1: Sirtuin (silent mating type information regulation 2 homolog) 1  
 SOCS-1: Suppressor of cytokine signalling 1  
 STAT: signal transducer and activator of transcription  
 SYK: Spleen tyrosine kinase  
 TLR 4 :Toll like receptor 4  
 TNF: Tumour necrosis factor  
 TPA: 12-O-tetradecanoylphorbol-13-acetate  
 TrX: Thioredoxin

## References

1. Y. Zhang, S. Yang, Z. Qiu, L. Huang, L. Huang, Y. Liang, X. Liu, M. Wang and B. Zhou, Pyrogallol enhances therapeutic effect of human umbilical cord mesenchymal stem cells against LPS-mediated inflammation and lung injury via activation of Nrf2/HO-1 signaling, *Free Radical Biology and Medicine*, 2022, **191**, 66-81.
2. E. Nicolis, I. Lampronti, M. C. Dececchi, M. Borgatti, A. Tamanini, N. Bianchi, V. Bezzetti, I. Mancini, M. Grazia Giri, P. Rizzotti, R. Gambari and G. Cabrini, Pyrogallol, an active compound from the medicinal plant *Emblica officinalis*, regulates expression of pro-inflammatory genes in bronchial epithelial cells, *International Immunopharmacology*, 2008, **8**, 1672-1680.
3. L. Villacorta, J. Zhang, M. T. Garcia-Barrio, X.-I. Chen, B. A. Freeman, Y. E. Chen and T. Cui, Nitro-linoleic acid inhibits vascular smooth muscle cell proliferation via the Keap1/Nrf2 signaling pathway, *American Journal of Physiology-Heart and Circulatory Physiology*, 2007, **293**, H770-H776.
4. K. Awwad, S. D. Steinbrink, T. Frömel, N. Lill, J. Isaak, A.-K. Häfner, J. Roos, B. Hofmann, H. Heide, G. Geisslinger, D. Steinhilber, B. A. Freeman, T. J. Maier and I. Fleming, Electrophilic fatty acid species inhibit 5-lipoxygenase and attenuate sepsis-induced pulmonary inflammation, *Antioxidants & Redox Signaling*, 2014, **20**, 2667-2680.
5. Y.-P. Zhu, X. Li, Y. Du, L. Zhang, L. Ran and N.-N. Zhou, Protective effect and mechanism of p-hydroxybenzaldehyde on blood-brain barrier, *Zhongguo Zhong yao za zhi = Zhongguo zhongyao zazhi = China journal of Chinese materia medica*, 2018, **43**, 1021-1027.
6. J.-H. Ha, D.-U. Lee, J.-T. Lee, J.-S. Kim, C.-S. Yong, J.-A. Kim, J.-S. Ha and K. Huh, 4-Hydroxybenzaldehyde from *Gastrodia elata* B1. is active in the antioxidation and GABAergic neuromodulation of the rat brain, *Journal of Ethnopharmacology*, 2000, **73**, 329-333.
7. H. Zhu, Q.-h. Liang, X.-g. Xiong, Y. Wang, Z.-h. Zhang, M.-j. Sun, X. Lu and D. Wu, Anti-inflammatory effects of p-Coumaric acid, a natural compound of *Oldenlandia diffusa*, on arthritis model Rats, *Evidence-Based Complementary and Alternative Medicine*, 2018, **2018**, 1-9.
8. R. Sabitha, K. Nishi, V. P. Gunasekaran, B. Agilan, E. David, G. Annamalai, R. Vinothkumar, M. Perumal, L. Subbiah and M. Ganeshan, p-Coumaric acid attenuates alcohol exposed hepatic injury through MAPKs, apoptosis and Nrf2 signaling in experimental models, *Chemico-Biological Interactions*, 2020, **321**, 109044.
9. J. Y. Lee, G. J. Kim, J. K. Choi, Y.-A. Choi, N.-H. Jeong, P.-H. Park, H. Choi and S.-H. Kim, 4-(Hydroxymethyl)catechol Extracted From Fungi in Marine Sponges Attenuates Rheumatoid Arthritis by Inhibiting PI3K/Akt/NF- $\kappa$ B Signaling, *Frontiers in Pharmacology*, 2018, **9**, 726.
10. Y. Ji, Z. Dai, S. Sun, X. Ma, Y. Yang, P. Tso, G. Wu and Z. Wu, Hydroxyproline Attenuates Dextran Sulfate Sodium-Induced Colitis in Mice: Involvement of the NF- $\kappa$ B Signaling and Oxidative Stress, *Molecular Nutrition & Food Research*, 2018, **62**, 1800494.
11. K.-J. Min, J.-H. Kim, I. Jou and E.-H. Joe, Adenosine induces hemoxygenase-1 expression in microglia through the activation of phosphatidylinositol 3-kinase and nuclear factor E2-related factor 2, *Glia*, 2008, **56**, 1028-1037.

12. J. Ren and S. H. Chung, Anti-inflammatory Effect of  $\alpha$ -Linolenic Acid and Its Mode of Action through the Inhibition of Nitric Oxide Production and Inducible Nitric Oxide Synthase Gene Expression via NF- $\kappa$ B and Mitogen-Activated Protein Kinase Pathways, *Journal of Agricultural and Food Chemistry*, 2007, **55**, 5073-5080.
13. S.-I. Alam, M.-W. Kim, F. A. Shah, K. Saeed, R. Ullah and M.-O. Kim, Alpha-Linolenic Acid Impedes Cadmium-Induced Oxidative Stress, Neuroinflammation, and Neurodegeneration in Mouse Brain, *Cells*, 2021, **10**, 2274.
14. A. Mastrofrancesco, M. Ottaviani, N. Aspite, G. Cardinali, E. Izzo, K. Graupe, C. C. Zouboulis, E. Camera and M. Picardo, Azelaic acid modulates the inflammatory response in normal human keratinocytes through PPAR $\gamma$  activation, *Experimental Dermatology*, 2010, **19**, 813-820.
15. W.-C. Huang, T.-H. Tsai, L.-T. Chuang, Y.-Y. Li, C. C. Zouboulis and P.-J. Tsai, Anti-bacterial and anti-inflammatory properties of capric acid against *Propionibacterium acnes*: A comparative study with lauric acid, *Journal of Dermatological Science*, 2014, **73**, 232-240.
16. H. U. Khan, K. Aamir, P. R. Jusuf, G. Sethi, S. P. Sisinthy, R. Ghildyal and A. Arya, Lauric acid ameliorates lipopolysaccharide (LPS)-induced liver inflammation by mediating TLR4/MyD88 pathway in Sprague Dawley (SD) rats, *Life Sciences*, 2021, **265**, 118750.
17. M. Jin, Y. Wei, H. Yu, X. Ma, S. Yan, L. Zhao, L. Ding, J. Cheng and H. Feng, Erythritol Improves Nonalcoholic Fatty Liver Disease by Activating Nrf2 Antioxidant Capacity, *Journal of Agricultural and Food Chemistry*, 2021, **69**, 13080-13092.
18. Y. Yang, L. Li, Q. Hang, Y. Fang, X. Dong, P. Cao, Z. Yin and L. Luo,  $\gamma$ -glutamylcysteine exhibits anti-inflammatory effects by increasing cellular glutathione level, *Redox Biology*, 2019, **20**, 157-166.
19. J. Liu, S. Lu, X. Zhang, J. Zhou, X. Yan, H. Liu, J. Liang, L. Luo, D. Zhou and Z. Yin,  $\gamma$ -Glutamylcysteine alleviates ethanol-induced hepatotoxicity via suppressing oxidative stress, apoptosis, and inflammation, *Journal of Food Biochemistry*, 2022, **46**, e14318.
20. Y. Ji, W. Yin, Y. Liang, L. Sun, Y. Yin and W. Zhang, Anti-Inflammatory and Anti-Oxidative Activity of Indole-3-Acetic Acid Involves Induction of HO-1 and Neutralization of Free Radicals in RAW264.7 Cells, *International Journal of Molecular Sciences*, 2020, **21**, 1579.
21. D. Kim, H. Kim, K. Kim and S. Roh, The protective effect of Indole-3-acetic acid (IAA) on H<sub>2</sub>O<sub>2</sub>-damaged human dental pulp stem cells is mediated by the AKT pathway and involves increased expression of the transcription factor Nuclear Factor-Erythroid 2-Related Factor 2 (Nrf2) and its downstream target Heme Oxygenase 1 (HO-1), *Oxidative Medicine and Cellular Longevity*, 2017, **2017**, 1-11.
22. S. Dayalan Naidu, T. Suzuki, D. Dikovskaya, E. V. Khatko, M. Higgins, M. Sato, M. Novak, J. A. Villegas, T. W. Moore, M. Yamamoto and A. T. Dinkova-Kostova, The isoquinoline PRL-295 increases the thermostability of Keap1 and disrupts its interaction with Nrf2, *iScience*, 2022, **25**, 103703.
23. M. W. Whitehouse, D. P. Fairlie and Y. H. Thong, Anti-inflammatory activity of the isoquinoline alkaloid, tetrandrine, against established adjuvant arthritis in rats, *Agents and Actions*, 1994, **42**, 123-127.
24. K. B. Hota, S. K. Hota, O. P. Chaurasia and S. B. Singh, Acetyl-L-carnitine-mediated neuroprotection during hypoxia is attributed to ERK1/2-Nrf2-regulated mitochondrial biosynthesis, *Hippocampus*, 2012, **22**, 723-736.
25. V. Calabrese, A. Ravagna, C. Colombrita, G. Scapagnini, E. Guagliano, M. Calvani, D. A. Butterfield and A. M. Giuffrida Stella, Acetylcarnitine induces heme oxygenase in rat astrocytes and protects against oxidative stress: Involvement of the transcription factor Nrf2, *Journal of Neuroscience Research*, 2005, **79**, 509-521.
26. M. Liang, Z. Wang, H. Li, L. Cai, J. Pan, H. He, Q. Wu, Y. Tang, J. Ma and L. Yang, L-Arginine induces antioxidant response to prevent oxidative stress via stimulation of glutathione synthesis and activation of Nrf2 pathway, *Food and Chemical Toxicology*, 2018, **115**, 315-328.
27. T. Ramprasath, P. Hamenth Kumar, S. Syed Mohamed Puhari, P. Senthil Murugan, V. Vasudevan and G. S. Selvam, L-Arginine ameliorates cardiac left ventricular oxidative stress by upregulating eNOS and Nrf2 target genes in alloxan-induced hyperglycemic rats, *Biochemical and Biophysical Research Communications*, 2012, **428**, 389-394.
28. Y. Qiu, X. Yang, L. Wang, K. Gao and Z. Jiang, L-arginine inhibited inflammatory response and oxidative stress induced by lipopolysaccharide via arginase-1 signaling in IPEC-J2 cells, *International Journal of Molecular Sciences*, 2019, **20**, 1800.
29. J. Zhao, L. Feng, Y. Liu, W. Jiang, P. Wu, J. Jiang, Y. Zhang and X. Zhou, Effect of dietary isoleucine on the immunity, antioxidant status, tight junctions and microflora in the intestine of juvenile Jian carp (*Cyprinus carpio* var. Jian), *Fish & Shellfish Immunology*, 2014, **41**, 663-673.
30. J. Cheng, J.-C. Tang, M.-X. Pan, S.-F. Chen, D. Zhao, Y. Zhang, H.-B. Liao, Y. Zhuang, R.-X. Lei, S. Wang, A.-C. Liu, J. Chen, Z.-H. Zhang, H.-T. Li, Q. Wan and Q.-X. Chen, L-lysine confers neuroprotection by suppressing inflammatory response via microRNA-575/PTEIN signaling after mouse intracerebral hemorrhage injury, *Experimental Neurology*, 2020, **327**, 113214.
31. M. N. Maralani, A. Movahedian and S. H. Javanmard, Antioxidant and cytoprotective effects of L-Serine on human endothelial cells, *Research in pharmaceutical sciences*, 2012, **7**, 209-215.
32. X. Zhou, H. Zhang, L. He, X. Wu and Y. Yin, Long-term L-serine administration reduces food intake and improves oxidative stress and Sirt1/NF $\kappa$ B signaling in the hypothalamus of aging mice, *Frontiers in Endocrinology*, 2018, **9**, 476.
33. C. J. Kim, J. A. Kovacs-Nolan, C. Yang, T. Archbold, M. Z. Fan and Y. Mine, L-Tryptophan exhibits therapeutic function in a porcine model of dextran sodium sulfate (DSS)-induced colitis, *Journal of Nutritional Biochemistry*, 2010, **21**, 468-475.

34. Y. Mine and H. Zhang, Calcium-Sensing Receptor (CaSR)-Mediated Anti-inflammatory Effects of L -Amino Acids in Intestinal Epithelial Cells, *Journal of Agricultural and Food Chemistry*, 2015, **63**, 9987-9995.
35. T. Kimura and Y. Watanabe, Tryptophan protects hepatocytes against reactive oxygen species-dependent cell death via multiple pathways including Nrf2-dependent gene induction, *Amino Acids*, 2016, **48**, 1263-1274.
36. H. Wen, L. Feng, W. Jiang, Y. Liu, J. Jiang, S. Li, L. Tang, Y. Zhang, S. Kuang and X. Zhou, Dietary tryptophan modulates intestinal immune response, barrier function, antioxidant status and gene expression of TOR and Nrf2 in young grass carp (*Ctenopharyngodon idella*), *Fish and Shellfish Immunology*, 2014, **40**, 275-287.
37. J. H. Lee, E. Park, H. J. Jin, Y. Lee, S. J. Choi, G. W. Lee, P. S. Chang and H. D. Paik, Anti-inflammatory and anti-genotoxic activity of branched chain amino acids (BCAA) in lipopolysaccharide (LPS) stimulated RAW 264.7 macrophages, *Food Science and Biotechnology*, 2017, **26**, 1371-1377.
38. C. Lauritano, K. Helland, G. Riccio, J. H. Andersen, A. Ianora and E. H. Hansen, Lysophosphatidylcholines and Chlorophyll-Derived Molecules from the Diatom *Cylindrotheca closterium* with Anti-Inflammatory Activity, *Marine Drugs*, 2020, **18**, 166.
39. I. Ali, Z. Manzoor, J.-E. Koo, S.-R. Moon, S.-H. Byeon, E.-S. Yoo, H.-K. Kang, J.-W. Hyun, N.-H. Lee and Y.-S. Koh, Monoolein, isolated from *Ishige sinicola*, inhibits lipopolysaccharide-induced inflammatory response by attenuating mitogen-activated protein kinase and NF- $\kappa$ B pathways, *Food Science and Biotechnology*, 2017, **26**, 507-511.
40. D. Hu, L. Zhang, R. Jiang, C. Liao, J. Xu, S. Jiang, Y. Yang, L. Lin, J. Huang, Y. Shen, L. Tang and L. Li, Nicotinic acid against acetaminophen-induced hepatotoxicity via Sirt1/Nrf2 antioxidative pathway in mice, *Journal of Nutritional Science and Vitaminology*, 2021, **67**, 145-152.
41. J. E. Digby, F. Martinez, A. Jefferson, N. Ruparella, J. Chai, M. Wamil, D. R. Greaves and R. P. Choudhury, Anti-Inflammatory Effects of Nicotinic Acid in Human Monocytes Are Mediated by GPR109A Dependent Mechanisms, *Arteriosclerosis, Thrombosis, and Vascular Biology*, 2012, **32**, 669-676.
42. R. D'Amico, T. Genovese, M. Cordaro, R. Siracusa, E. Gugliandolo, A. F. Peritore, L. Interdonato, R. Crupi, S. Cuzzocrea, R. Di Paola, R. Fusco and D. Impellizzeri, Palmitoylethanolamide/Baicalein regulates the androgen receptor signaling and NF- $\kappa$ B/Nrf2 pathways in Benign Prostatic Hyperplasia, *Antioxidants*, 2021, **10**, 1014.
43. T. Genovese, E. Esposito, E. Mazzon, R. D. Paola, R. Meli, P. Bramanti, D. Piomelli, A. Calignano and S. Cuzzocrea, Effects of Palmitoylethanolamide on Signaling Pathways Implicated in the Development of Spinal Cord Injury, *Journal of Pharmacology and Experimental Therapeutics*, 2008, **326**, 12-23.
44. S. Kim, I. Hong, J. S. Hwang, J. K. Choi, H. S. Rho, D. H. Kim, I. Chang, S. H. Lee, M.-O. Lee and J. S. Hwang, Phytosphingosine Stimulates the Differentiation of Human Keratinocytes and Inhibits TPA-Induced Inflammatory Epidermal Hyperplasia in Hairless Mouse Skin, *Molecular Medicine*, 2006, **12**, 17-24.
45. X. Ren, H. Sun, C. Zhang, C. Li, J. Wang, J. I. E. Shen, D. Yu and L. I. Kong, Protective function of pyridoxamine on retinal photoreceptor cells via activation of the p-Erk1/2/Nrf2/Trx/ASK1 signalling pathway in diabetic mice, *Molecular Medicine Reports*, 2016, **14**, 420-424.
46. C. Vieira, S. Evangelista, R. Cirillo, A. Lippi, C. A. Maggi and S. Manzini, Effect of ricinoleic acid in acute and subchronic experimental models of inflammation, *Mediators of Inflammation*, 2000, **9**, 223-228.
47. M. Raish, A. Ahmad, Y. A. Bin Jordan, M. Shahid, K. M. Alkharfy, A. Ahad, M. A. Ansari, I. A. Abdelrahman and F. I. Al-Jenoobi, Sinapic acid ameliorates cardiac dysfunction and cardiomyopathy by modulating NF- $\kappa$ B and Nrf2/HO-1 signaling pathways in streptozocin induced diabetic rats, *Biomedicine & Pharmacotherapy*, 2022, **145**, 112412.
48. M. A. Ansari, M. Raish, Y. A. Bin Jordan, A. Ahmad, M. Shahid, S. F. Ahmad, N. Haq, M. R. Khan and S. A. Bakheet, Sinapic acid ameliorates D-galactosamine/lipopolysaccharide-induced fulminant hepatitis in rats: Role of nuclear factor erythroid-related factor 2/heme oxygenase-1 pathways, *World Journal of Gastroenterology*, 2021, **27**, 592-608.
49. Y. Song, L. Wen, J. Sun, W. Bai, R. Jiao, Y. Hu, X. Peng, Y. He and S. Ou, Cytoprotective mechanism of ferulic acid against high glucose-induced oxidative stress in cardiomyocytes and hepatocytes, *Food & Nutrition Research*, 2016, **60**, 30323.
50. A. M. Mahmoud, O. E. Hussein, W. G. Hozayen, M. Bin-Jumah and S. M. Abd El-Twab, Ferulic acid prevents oxidative stress, inflammation, and liver injury via upregulation of Nrf2/HO-1 signaling in methotrexate-induced rats, *Environmental Science and Pollution Research*, 2020, **27**, 7910-7921.
51. M. Khalili, M. Alavi, E. Esmaeil-Jamaat, T. Baluchnejadmojarad and M. Roghani, Trigonelline mitigates lipopolysaccharide-induced learning and memory impairment in the rat due to its anti-oxidative and anti-inflammatory effect, *International Immunopharmacology*, 2018, **61**, 355-362.
52. C. Fouzder, A. Mukhuty, S. Mukherjee, C. Malick and R. Kundu, Trigonelline inhibits Nrf2 via EGFR signalling pathway and augments efficacy of Cisplatin and Etoposide in NSCLC cells, *Toxicology in Vitro*, 2021, **70**, 105038.
53. N. N. Younis, N. M. Elsherbiny, M. A. Shaheen and M. M. Elseweidy, Modulation of NADPH oxidase and Nrf2/HO-1 pathway by vanillin in cisplatin-induced nephrotoxicity in rats, *Journal of Pharmacy and Pharmacology*, 2020, **72**, 1546-1555.
54. S. Bais, R. Kumari Rana, N. Dongre, G. Goyanar, A. Singh Panwar, A. Kumar Soni and S. Lal Singune, Protective effect of pantothenic acid in kainic acid-induced status epilepticus and associated neurodegeneration in mice, *Advanced Neurology*, 2022, **1**, 40.



55. Q. Ma, M. Liang, X. Tang, F. Luo and C. Dou, Vitamin B5 inhibit RANKL induced osteoclastogenesis and ovariectomy induced osteoporosis by scavenging ROS generation, *American journal of translational research*, 2019, **11**, 5008-5018.
56. W. Li, K. Zhang and H. Yang, Pectin Alleviates High Fat (Lard) Diet-Induced Nonalcoholic Fatty Liver Disease in Mice: Possible Role of Short-Chain Fatty Acids and Gut Microbiota Regulated by Pectin, *Journal of Agricultural and Food Chemistry*, 2018, **66**, 8015-8025.
57. D. C. Silva, A. L. P. Freitas, C. D. S. Pessoa, R. C. M. Paula, J. X. Mesquita, L. K. A. M. Leal, G. A. C. Brito, D. O. Gonçalves and G. S. B. Viana, Pectin from *Passiflora edulis* shows anti-inflammatory action as well as hypoglycemic and hypotriglyceridemic properties in diabetic rats, *Journal of Medicinal Food*, 2011, **14**, 1118-1126.
58. S. N. Lewis, L. Brannan, A. J. Guri, P. Lu, R. Hontecillas, J. Bassaganya-Riera and D. R. Bevan, Dietary  $\alpha$ -Eleostearic Acid Ameliorates Experimental Inflammatory Bowel Disease in Mice by Activating Peroxisome Proliferator-Activated Receptor- $\gamma$ , *PLoS ONE*, 2011, **6**, e24031.
59. T. Boussetta, H. Raad, P. Lett eron, M.-A. Gougerot-Pocidalo, J.-C. Marie, F. Driss and J. El-Benna, Punicic acid a conjugated linolenic acid inhibits TNF $\alpha$ -induced neutrophil hyperactivation and protects from experimental colon inflammation in rats, *PLoS ONE*, 2009, **4**, e6458.
60. Y.-Y. Zhang, Y.-D. Yao, F. Chen, X. Guo, J.-L. Kang, Y.-F. Huang, F. He, Y. Dong, Y. Xie, P. Wu and H. Zhou, (9S,13R)-12-oxo-phytodienoic acid attenuates inflammation by inhibiting mPGES-1 and modulating macrophage polarization via NF- $\kappa$ B and Nrf2/HO-1 pathways, *Pharmacological Research*, 2022, **182**, 106310.
61. N. Taki-Nakano, J. Kotera and H. Ohta, 12-oxo-phytodienoic acid, a plant-derived oxylipin, attenuates lipopolysaccharide-induced inflammation in microglia, *Biochemical and Biophysical Research Communications*, 2016, **473**, 1288-1294.
62. S. Kawashima, M. Hayashi, T. Takii, H. Kimura, H. L. Zhang, A. Nagatsu, J. Sakakibara, K. Murata, Y. Oomoto and K. Onozaki, Serotonin derivative, N-(p-Coumaroyl) Serotonin, inhibits the production of TNF- $\alpha$ , IL-1 $\alpha$ , IL-1 $\beta$ , and IL-6 by endotoxin-stimulated human blood monocytes, *Journal of Interferon & Cytokine Research*, 1998, **18**, 423-428.
63. T. Takimoto, K. Suzuki, H. Arisaka, T. Murata, H. Ozaki and N. Koyama, Effect of N-(p-coumaroyl)serotonin and N-feruloylserotonin, major anti-atherogenic polyphenols in safflower seed, on vasodilation, proliferation and migration of vascular smooth muscle cells, *Molecular Nutrition & Food Research*, 2011, **55**, 1561-1571.
64. N. Nagahora, H. Yamada, S. Kikuchi, M. Hakozaiki and A. Yano, Nrf2 Activation by 5-lipoxygenase Metabolites in Human Umbilical Vascular Endothelial Cells, *Nutrients*, 2017, **9**, 1001.
65. M. H. Lowry, B. P. McAllister, J.-C. Jean, L. A. S. Brown, R. P. Hughey, W. W. Cruikshank, S. Amar, E. C. Lucey, K. Braun, P. Johnson, T. N. Wight and M. Joyce-Brady, Lung Lining Fluid Glutathione Attenuates IL-13-Induced Asthma, *American Journal of Respiratory Cell and Molecular Biology*, 2008, **38**, 509-516.
66. H.-N. Wang, Q.-A. Xiang, H.-H. Lin, J.-N. Chen, W.-J. Guo, W.-M. Guo, X.-N. Yue, Z.-F. Zhao, K. Ji and J.-J. Chen, Plant-derived molecule 4-Methylumbelliferone suppresses Fc $\epsilon$ RI-mediated mast cell activation and allergic inflammation, *Molecules*, 2022, **27**, 1577-1577.
67. V. Shalini, A. Jayalekshmi and A. Helen, Mechanism of anti-inflammatory effect of tricrin, a flavonoid isolated from Njavara rice bran in LPS induced hPBMCs and carrageenan induced rats, *Molecular Immunology*, 2015, **66**, 229-239.
68. Y. Liu, X. Qu, M. Yan, D. Li and R. Zou, Tricin attenuates cerebral ischemia/reperfusion injury through inhibiting nerve cell autophagy, apoptosis and inflammation by regulating the PI3K/Akt pathway, *Human & Experimental Toxicology*, 2022, **41**, 9603271221125928.
